# Supplementary material
Source: PubMed Central journal article supplement (PMC2763641)
Supplement: NIHMS111133-supplement-fig_legends_supplemnet.pdf [file NIHMS111133-supplement-fig_legends_supplemnet.pdf]

**Supplemental Figure 1: Longitudinal growth is intact in CD47<sup>-/-</sup> mice**

**A.** Isolated WT (n=8) and CD47<sup>-/-</sup> (n=8) femur length was measured by calipers. p= 0.52

**B.** Whole body length of WT (n=4) and CD47<sup>-/-</sup> (n=4) mice was measured by calipers.

p= 0.55

**Supplemental Figure 2: Absolute tumor volume in bone is decreased in CD47<sup>-/-</sup>**

**mice**

**A.** Tumor volume from Figure 5E is shown as absolute tumor volume. p= 0.04

**B.** Tumor volume from Figure 6D is shown as absolute tumor volume. p= 0.04
