# Supplementary material
Source: PubMed Central journal article supplement (PMC2763641)

**A**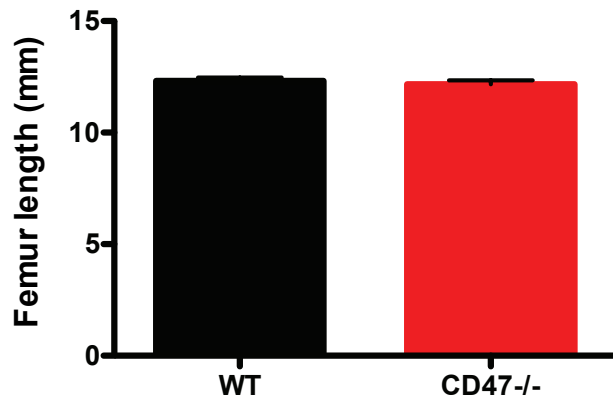**B**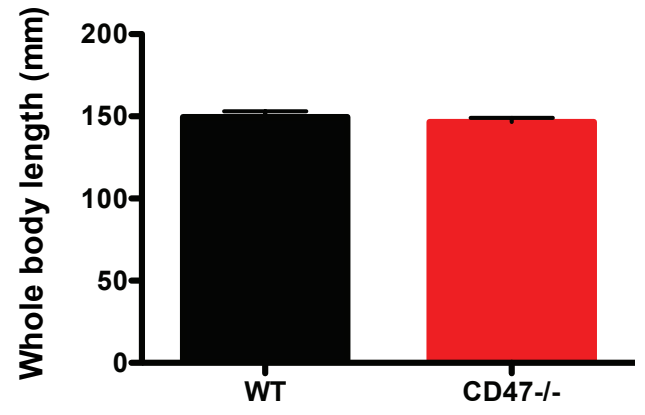

Supplement: NIHMS111133-supplement-fig_1_supplement.pdf [file NIHMS111133-supplement-fig_1_supplement.pdf]

**A**

**Absolute Tumor Volume  
intra-arterial model**

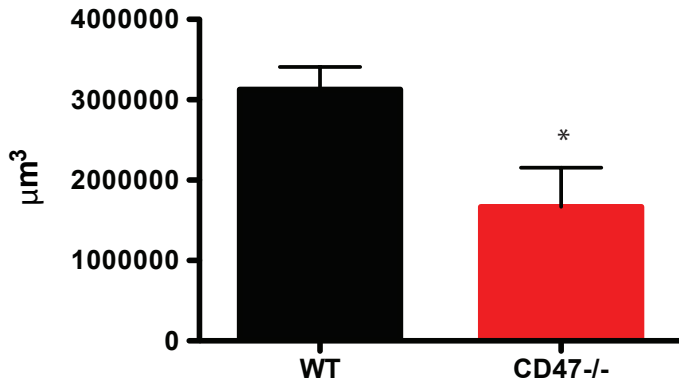

**Absolute Tumor Volume  
intra-tibial model**

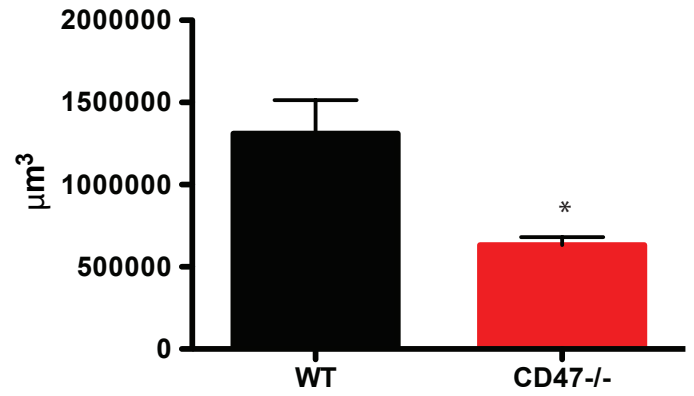

Supplement: NIHMS111133-supplement-fig_2-supplement.pdf [file NIHMS111133-supplement-fig_2-supplement.pdf]
